# Supplementary material for: Historic checklist, core species and temporal composition turnover of birds in an urban protected natural area in central México over 50 years
Source: PeerJ. 2024 Aug 20;12:e17888. doi: 10.7717/peerj.17888 (PMC11342928; doi:10.7717/peerj.17888)
Supplement: Supplemental Information 1 — Raw data of abundance of each bird species in REPSA. Number of recorded individuals, percentage of persistence and persistence category for each species are shown. Species were ordered based on their percentage of persistence in the reserve. [file peerj-12-17888-s001.xlsx]

## Sheet: Raw_data
Supplemental information. Raw data of abundance of each bird species in REPSA. Number of recorded individuals, percentage of persistence and persistence category for each species are shown. Species were ordered based on their percentage of persistence in the reserve.
Bird species	Abundance (n)	Persistence (%)	Persistence category
Catherpes mexicanus	144	100	Core
Columbina inca	265	100	Core
Corthylio calendula	107	100	Core
Cynanthus latirostris	386	100	Core
Dryobates scalaris	140	100	Core
Eugenes fulgens	28	100	Core
Haemorhous mexicanus	1495	100	Core
Hirundo rustica	377	100	Core
Icterus parisorum	36	100	Core
Melozone fusca	275	100	Core
Oreothlypis celata	75	100	Core
Pheuticus melanocephalus	116	100	Core
Polioptila caerulea	125	100	Core
Psaltriparus minimus	1189	100	Core
Saucerottia beryllina	425	100	Core
Setophaga coronata	464	100	Core
Spizella passerina	185	100	Core
Toxostoma curvirostre	139	100	Core
Turdus migratorius	248	100	Core
Turdus rufopalliatus	187	100	Core
Aimophila ruficeps	84	93.3333	Core
Cardellina pusilla	143	93.3333	Core
Contopus pertinax	50	93.3333	Core
Diglossa baritula	81	93.3333	Core
Geothlypis tolmiei	20	93.3333	Core
Mniotilta varia	32	93.3333	Core
Molothrus aeneus	146	93.3333	Core
Oreothlypis ruficapilla	68	93.3333	Core
Pyrocephalus rubinus	280	93.3333	Core
Spinus psaltria	319	93.3333	Core
Thryomanes bewickii	252	93.3333	Core
Tyrannus vociferans	208	93.3333	Core
Cardinalis cardinalis	71	86.6667	Core
Geothlypis nelsoni	103	86.6667	Core
Icterus abeillei	61	86.6667	Core
Myioborus miniatus	14	86.6667	Core
Passer domesticus	240	86.6667	Core
Passerina caerulea	92	86.6667	Core
Piranga ludoviciana	27	86.6667	Core
Piranga rubra	46	86.6667	Core
Spizella atrogularis	29	86.6667	Core
Empidonax fulvifrons	91	80	Core
Falco sparverius	20	80	Core
Melospiza lincolnii	18	80	Core
Melospiza melodia	84	80	Core
Ptiliogonys cinereus	477	80	Core
Setophaga townsendi	23	80	Core
Troglodytes aedon	24	80	Core
Petrochelidon pyrrhonota	169	73.3333	Core
Setophaga nigrescens	22	73.3333	Core
Setophaga occidentalis	17	73.3333	Core
Accipiter cooperii	38	66.6667	Core
Aphelocoma woodhouseii	23	66.6667	Core
Butorides virescens	22	66.6667	Core
Icterus bullockii	20	66.6667	Core
Icterus spurius	17	66.6667	Core
Melanotis caerulescens	22	66.6667	Core
Vireo gilvus	26	66.6667	Core
Anas diazi	67	60	Intermediate
Calothorax lucifer	7	60	Intermediate
Empidonax hammondii	22	60	Intermediate
Stelgidopteryx serripennis	40	60	Intermediate
Vireo huttoni	11	60	Intermediate
Basilinna leucotis	2	53.3333	Intermediate
Camptostoma imberbe	6	53.3333	Intermediate
Chondrohierax uncinatus	13	53.3333	Intermediate
Contopus sordidulus	5	53.3333	Intermediate
Empidonax difficilis	19	53.3333	Intermediate
Empidonax minimus	9	53.3333	Intermediate
Empidonax oberholseri	26	53.3333	Intermediate
Lanius ludovicianus	4	53.3333	Intermediate
Nycticorax nycticorax	52	53.3333	Intermediate
Quiscalus mexicanus	56	53.3333	Intermediate
Spizella pallida	29	53.3333	Intermediate
Accipiter striatus	12	46.6667	Intermediate
Ardea herodias	10	46.6667	Intermediate
Bombycilla cedrorum	15	46.6667	Intermediate
Catharus guttatus	3	46.6667	Intermediate
Columba livia	24	46.6667	Intermediate
Fulica americana	35	46.6667	Intermediate
Gallinula galeata	32	46.6667	Intermediate
Myiarchus cinerascens	9	46.6667	Intermediate
Parkesia noveboracensis	7	46.6667	Intermediate
Ramosomyia violiceps	8	46.6667	Intermediate
Chaetura vauxi	28	40	Intermediate
Chondestes grammacus	13	40	Intermediate
Cyanocorax yncas	11	40	Intermediate
Cypseloides niger	18	40	Intermediate
Lampornis clemenciae	2	40	Intermediate
Mimus polyglottos	6	40	Intermediate
Passerina versicolor	7	40	Intermediate
Basileuterus rufifrons	9	33.3333	Transient
Bubo virginianus	3	33.3333	Transient
Buteo jamaicensis	5	33.3333	Transient
Geothlypis trichas	3	33.3333	Transient
Icterus cucullatus	3	33.3333	Transient
Passerin cyanea	4	33.3333	Transient
Podilymbus podiceps	9	33.3333	Transient
Spatula clypeata	12	33.3333	Transient
Sporophila torqueola	21	33.3333	Transient
Archilochus colubris	5	26.6667	Transient
Ardea alba	22	26.6667	Transient
Contopus cooperi	3	26.6667	Transient
Icterus galbula	5	26.6667	Transient
Molothrus ater	3	26.6667	Transient
Parabuteo unicintus	4	26.6667	Transient
Passerina ciris	5	26.6667	Transient
Peucedramus taeniatus	10	26.6667	Transient
Pheuticus ludovicianus	9	26.6667	Transient
Piranga flava	2	26.6667	Transient
Pooecetes gramineus	5	26.6667	Transient
Shyrapicus varius	3	26.6667	Transient
Zenaida macroura	5	26.6667	Transient
Cathartes aura	4	20	Transient
Catharus ustulatus	3	20	Transient
Icterus gularis	3	20	Transient
Leiothlypis virginiae	3	20	Transient
Melozone kieneri	3	20	Transient
Myiarchus tuberculifer	3	20	Transient
Sayornis nigricans	3	20	Transient
Selasphorus platycercus	3	20	Transient
Selasphorus rufus	3	20	Transient
Setophaga virens	3	20	Transient
Streptoprocne rutila	3	20	Transient
Tachybaptus dominicus	4	20	Transient
Vireo bellii	3	20	Transient
Vireo plumbeus	3	20	Transient
Vireo solitarius	3	20	Transient
Agelaius phoeniceus	2	13.3333	Transient
Aix sponsa	2	13.3333	Transient
Amazona autumnalis	2	13.3333	Transient
Aphelocoma ultramarina	2	13.3333	Transient
Archilochus alexandri	2	13.3333	Transient
Atlapates pileatus	2	13.3333	Transient
Buteo platypterus	3	13.3333	Transient
Calocitta formosa	2	13.3333	Transient
Chlorophonia elegantissima	4	13.3333	Transient
Chordeiles acutipennis	2	13.3333	Transient
Circus hudsonius	2	13.3333	Transient
Cistothorus palustris	2	13.3333	Transient
Coccyzus americanus	2	13.3333	Transient
Cyanocitta stelleri	2	13.3333	Transient
Icteria virens	2	13.3333	Transient
Leiothlypis peregrina	2	13.3333	Transient
Loxia curvirostra	2	13.3333	Transient
Megaceryle alcyon	2	13.3333	Transient
Myiopagis viridicata	2	13.3333	Transient
Myiopsitta monachus	2	13.3333	Transient
Parkesia motacilla	3	13.3333	Transient
Passerculus sandwichensis	2	13.3333	Transient
Poecile sclateri	2	13.3333	Transient
Salpinctes obsoletus	2	13.3333	Transient
Selasphorus heloisa	2	13.3333	Transient
Setophaga ruticilla	2	13.3333	Transient
Sitta carolinensis	2	13.3333	Transient
Spiza americana	4	13.3333	Transient
Tyrannus forficatus	2	13.3333	Transient
Tyrannus verticalis	2	13.3333	Transient
Zenaida asiatica	2	13.3333	Transient
Actitis macularius	1	6.66667	Transient
Aeronautes saxatalis	1	6.66667	Transient
Agapornis personatus	1	6.66667	Transient
Agapornis roseicollis	1	6.66667	Transient
Amazona albifrons	1	6.66667	Transient
Amazona oratrix	1	6.66667	Transient
Amazona viridigenalis	1	6.66667	Transient
Ammodramus savannarum	1	6.66667	Transient
Anas americana	1	6.66667	Transient
Antrostomus arizonae	1	6.66667	Transient
Arremon virenticeps	1	6.66667	Transient
Buteo brachyurus	1	6.66667	Transient
Buteo lineatus	1	6.66667	Transient
Buteo swainsoni	1	6.66667	Transient
Buteogallus anthracinus	1	6.66667	Transient
Calocitta colliei	1	6.66667	Transient
Campylorhynchus megalopterus	1	6.66667	Transient
Cardellina rubra	1	6.66667	Transient
Catharus aurantiirostris	1	6.66667	Transient
Catharus occidentalis	1	6.66667	Transient
Certhia americana	1	6.66667	Transient
Charadrius semipalmatus	1	6.66667	Transient
Charadrius vociferus	1	6.66667	Transient
Colaptes auratus	1	6.66667	Transient
Colibri thalassinus	1	6.66667	Transient
Columbina passerina	1	6.66667	Transient
Contopus virens	1	6.66667	Transient
Corvus corax	1	6.66667	Transient
Crotophaga sulcirostris	1	6.66667	Transient
Cyanocorax sanblasianus	1	6.66667	Transient
Dives dives	1	6.66667	Transient
Dryobates villosus	1	6.66667	Transient
Dumetella carolinensis	1	6.66667	Transient
Egretta tricolor	3	6.66667	Transient
Empidonax albigularis	1	6.66667	Transient
Empidonax wrightii	1	6.66667	Transient
Eupsittula canicularis	1	6.66667	Transient
Falco columbarius	1	6.66667	Transient
Falco mexicanus	1	6.66667	Transient
Falco peregrinus	1	6.66667	Transient
Heliomaster constantii	1	6.66667	Transient
Icterus wagleri	1	6.66667	Transient
Junco phaeonotus	1	6.66667	Transient
Mareca strepera	1	6.66667	Transient
Megascops asio	1	6.66667	Transient
Megascops kennicottii	1	6.66667	Transient
Melanerpes aurifrons	1	6.66667	Transient
Melanerpes chrysogenys	1	6.66667	Transient
Melanerpes formicivorus	1	6.66667	Transient
Mitrephanes phaeocercus	1	6.66667	Transient
Myadestes occidentalis	1	6.66667	Transient
Myioborus pictus	1	6.66667	Transient
Oreothlypis superciliosa	1	6.66667	Transient
Oriturus superciliosus	1	6.66667	Transient
Pandion haliaetus	1	6.66667	Transient
Passerina amoena	1	6.66667	Transient
Pelecanus erythrorhynchos	15	6.66667	Transient
Pipilo chlorurus	1	6.66667	Transient
Pipilo maculatus	1	6.66667	Transient
Piranga bidentata	1	6.66667	Transient
Pitangus sulphuratus	1	6.66667	Transient
Plegadis chihi	1	6.66667	Transient
Podiceps nigricollis	1	6.66667	Transient
Protonotaria citrea	1	6.66667	Transient
Psilorhinus morio	1	6.66667	Transient
Regulus satrapa	1	6.66667	Transient
Riparia riparia	1	6.66667	Transient
Sayornis phoebe	1	6.66667	Transient
Sayornis saya	1	6.66667	Transient
Seiurus aurocapilla	1	6.66667	Transient
Selasphorus calliope	1	6.66667	Transient
Selasphorus sasin	1	6.66667	Transient
Setophaga americana	1	6.66667	Transient
Setophaga citrina	1	6.66667	Transient
Setophaga dominica	1	6.66667	Transient
Setophaga graciae	1	6.66667	Transient
Setophaga petechia	2	6.66667	Transient
Sicalis luteola	1	6.66667	Transient
Sitta pygmaea	1	6.66667	Transient
Spatula discors	1	6.66667	Transient
Spinus notatus	1	6.66667	Transient
Spinus pinus	1	6.66667	Transient
Streptopelia decaocto	2	6.66667	Transient
Streptoprocne semicollaris	6	6.66667	Transient
Sturnus vulgaris	1	6.66667	Transient
Tachycineta bicolor	1	6.66667	Transient
Tachycineta thalassina	1	6.66667	Transient
Tilmatura dupontii	1	6.66667	Transient
Toxostoma ocellatum	1	6.66667	Transient
Trogon elegans	1	6.66667	Transient
Turdus assimilis	1	6.66667	Transient
Turdus grayi	1	6.66667	Transient
Tyrannus melancholicus	1	6.66667	Transient
Tyrannus tyrannus	1	6.66667	Transient
Tyto alba	1	6.66667	Transient
Vireo atricapilla	1	6.66667	Transient
Vireo cassinii	2	6.66667	Transient
Vireo nelsoni	1	6.66667	Transient
Vireo philadelphicus	1	6.66667	Transient

## Sheet: Species_composition
Species composition of birds (columns) in the years analyzed (rows). Species names consist of the first letter of the genus and the first three or four letters of the species.
	Aalbi	Aalba	Aale	Aame	Aari	Aaut	Acol	Acoo	Adia	Aher	Amac	Aora	Apho	Apil	Aruf	Aspo	Astr	Ault	Avir	Awoo	Bant	Bced	Bjam	Bleu	Blin	Bpla	Bruf	Bswa	Bvirgi	Bvires	Cacu	Cerame	Cocame	Caura	Caur	Colaur	Ccal	Ccar	Ccol	Ccoo	Ccor	Cele	Cfor	Cgra	Cgut	Chud	Cimb	Cinc	Clat
1973	0	0	0	0	0	0	1	0	0	0	0	0	0	0	1	0	0	0	0	0	0	1	0	1	0	0	1	0	0	0	0	0	0	0	1	0	1	1	0	0	0	0	0	1	1	0	0	1	1
1982	0	0	0	0	0	0	0	0	0	0	0	0	0	0	1	0	0	1	0	0	0	0	0	1	0	0	0	0	0	0	0	0	0	0	0	0	1	0	0	0	0	0	0	0	0	0	0	1	1
1994	0	0	0	0	0	0	0	0	0	0	0	0	0	1	1	0	0	1	0	0	0	1	0	1	0	0	1	1	0	0	1	1	1	0	0	1	1	1	0	1	0	0	0	1	1	0	1	1	1
2002	0	0	0	0	1	1	0	0	0	0	0	0	0	0	1	0	1	0	1	1	0	1	0	1	0	0	1	0	0	1	0	0	0	0	0	0	1	1	0	0	0	0	1	1	1	1	1	1	1
2003	1	0	1	0	0	1	0	1	0	0	0	0	0	0	1	0	0	0	0	1	1	1	0	1	0	0	0	0	1	1	0	0	1	0	0	0	1	1	0	0	0	0	1	0	1	0	0	1	1
2010	0	0	0	0	0	0	1	0	0	0	0	0	0	1	0	0	0	0	0	0	0	1	0	1	0	0	1	0	0	0	0	0	0	0	0	0	1	0	0	0	0	0	0	0	0	0	1	1	1
2013	0	1	0	1	0	0	0	1	1	1	0	0	1	0	1	0	1	0	0	1	0	0	1	0	0	0	1	0	1	1	0	0	0	0	0	0	1	1	1	0	0	0	0	0	1	1	1	1	1
2014	0	1	0	0	0	0	0	1	1	0	0	0	0	0	1	0	1	0	0	1	0	0	1	1	0	0	0	0	0	1	1	0	0	0	0	0	1	1	0	0	0	0	0	0	0	0	1	1	1
2015	0	0	0	0	0	0	0	1	1	1	0	0	0	0	1	0	1	0	0	1	0	0	1	0	1	0	0	0	0	1	0	0	0	0	0	0	1	1	0	1	0	0	0	1	1	0	1	1	1
2016	0	0	1	0	0	0	0	1	1	1	0	0	0	0	1	0	1	0	0	1	0	0	1	0	0	1	0	0	1	1	0	0	0	0	0	0	1	1	0	0	0	1	0	1	0	0	0	1	1
2017	0	0	0	0	0	0	0	1	1	0	0	0	0	0	1	0	0	0	0	1	0	1	0	1	0	0	0	0	0	0	0	0	0	0	0	0	1	1	0	0	0	0	0	0	0	0	0	1	1
2018	0	1	0	0	0	0	0	1	1	1	0	0	0	0	1	0	0	0	0	1	0	0	0	0	0	1	0	0	0	1	0	0	0	1	0	0	1	1	0	0	0	0	0	0	0	0	0	1	1
2019	0	1	0	0	0	0	1	1	1	1	0	0	1	0	1	0	0	0	0	1	0	0	0	0	0	0	0	0	1	1	0	0	0	0	0	0	1	1	0	1	0	0	0	0	0	0	0	1	1
2022	0	0	0	0	0	0	0	1	1	1	0	0	0	0	1	1	1	0	0	0	0	0	0	0	0	0	0	0	1	1	0	0	0	1	0	0	1	1	0	0	0	1	0	1	0	0	1	1	1
2023	0	0	0	0	0	0	1	1	1	1	0	0	0	0	1	1	1	0	0	1	0	1	1	0	0	0	0	0	0	1	0	0	0	1	0	0	1	1	0	1	0	0	0	0	1	0	1	1	1
[truncated: 175 more columns]
